# Supplementary material for: E–Mental Health Self-Management for Psychotic Disorders: State of the Art and Future Perspectives
Source: Atypon-hosted journal article supplement (doi:10.1176/appi.ps.201300050), 2013-10-15

Records identified and retrieved through database searching  
 $n = 3317$   
(Medline, PsychINFO, AMED, CINAHL, and Library, Information Science & Technology)

Additional records identified through reference lists  
 $n = 10$

Records after duplicates removed  
 $n = 3069$

Records excluded based on eligibility criteria  
 $n = 2925$

Abstracts reviewed  
 $n = 144$

Articles excluded based on eligibility criteria  
 $n = 74$

Full-text articles assessed for eligibility  
 $n = 70$

Full-text articles excluded  
 $n = 42$   
Reasons for exclusion:  
- Study describing a tool/an intervention for research or diagnostic purposes only:  $n = 15$   
- Double publication:  $n = 14$   
- Cognitive remediation:  $n = 4$   
- Background article:  $n = 4$   
- No psychotic disorder:  $n = 2$   
- Lacking relevant information:  $n = 2$   
- No e-health application:  $n = 1$

Fleiss' kappa: 0.79

Studies included in systematic review  
 $n = 28$

| <b>List of excluded studies</b>          |                                                                                                        |
|------------------------------------------|--------------------------------------------------------------------------------------------------------|
| <b>Excluded study</b>                    | <b>Rationale for exclusion</b>                                                                         |
| <b>Ahmed et al., 1997(1)</b>             | Study describing a tool for computer-based cognitive remediation/enhancement                           |
| <b>Ahmed et al., 2002(2)</b>             | 1) Study describing a tool for computer-based cognitive remediation/enhancement, 2) double publication |
| <b>Alger, 1989(3)</b>                    | Lacking information                                                                                    |
| <b>Andrews et al., 2010(4)</b>           | Theoretical/background article                                                                         |
| <b>Anttila et al., 2008(5)</b>           | Double publication (we included Kuosmanen et al., 2009)                                                |
| <b>Baker et al., 2006(6)</b>             | Study describing a tool intended for research or diagnostic purposes only                              |
| <b>Brief et al., 1994(7)</b>             | Study describing a tool for computer-based cognitive remediation/enhancement                           |
| <b>Chinman et al., 2004(8)</b>           | Study describing a tool intended for research or diagnostic purposes only                              |
| <b>Chinman et al., 2007(9)</b>           | 1) Study describing a tool intended for research or diagnostic purposes only, 2) Double publication    |
| <b>Cohen et al., 2008(10)</b>            | Study describing a tool intended for research or diagnostic purposes only                              |
| <b>Delisi et al., 2011(11)</b>           | Theoretical/background article                                                                         |
| <b>Fernández-Aranda et al., 2012(12)</b> | No psychotic disorder                                                                                  |
| <b>Ferron et al., 2011(13)</b>           | Double publication (we included Brunette et al., 2011)                                                 |
| <b>Freeman, 2008(14)</b>                 | Study describing a tool intended for research or                                                       |

|                                    |                                                                                               |
|------------------------------------|-----------------------------------------------------------------------------------------------|
|                                    | diagnostic purposes only                                                                      |
| <b>Godleski et al., 2012(15)</b>   | No psychotic disorder                                                                         |
| <b>Gorrindo et al., 2009(16)</b>   | Study describing a tool intended for research or diagnostic purposes only                     |
| <b>Grady et al., 2011(17)</b>      | Study describing a tool intended for research or diagnostic purposes only                     |
| <b>Hansson et al., 2008(18)</b>    | Double publication (we included Priebe et al., 2007)                                          |
| <b>Hätönen et al., 2010(19)</b>    | Double publication (we included Kuosmanen et al., 2009)                                       |
| <b>Jeste et al., 2009(20)</b>      | Study describing a tool intended for research or diagnostic purposes only                     |
| <b>Jimison et al., 1998(21)</b>    | Study describing a tool intended for research or diagnostic purposes only                     |
| <b>Kim et al., 2007(22)</b>        | Study describing a tool intended for research or diagnostic purposes only                     |
| <b>Koivunen et al., 2007(23)</b>   | Double publication (we included Kuosmanen et al., 2009)                                       |
| <b>Koivunen et al., 2008(24)</b>   | Double publication (we included Kuosmanen et al., 2009)                                       |
| <b>Koivunen et al., 2010(25)</b>   | Double publication (we included Kuosmanen et al., 2009)                                       |
| <b>Kuosmanen et al., 2010(26)</b>  | Double publication (we included Kuosmanen et al., 2009)                                       |
| <b>Pijnenborg et al., 2007(27)</b> | Double publication (we included Pijnenborg et al., 2010)                                      |
| <b>Pitkänen et al., 2011(28)</b>   | 1) Theoretical/background article, 2) Double publication (we included Kuosmanen et al., 2009) |
|                                    |                                                                                               |

|                                  |                                                                              |
|----------------------------------|------------------------------------------------------------------------------|
| <b>Puskar et al., 2011(29)</b>   | Double publication (we included Bickmore et al., 2010)                       |
| <b>Rotondi et al., 2005(30)</b>  | Double publication (we included Rotondi et al., 2010)                        |
| <b>Spaniel et al., 2008a(31)</b> | Double publication (we included Spaniel et al., 2012)                        |
| <b>Spaniel et al., 2008b(32)</b> | Double publication (we included Spaniel et al., 2012)                        |
| <b>Steel et al., 2010(33)</b>    | Study describing a tool for computer-based cognitive remediation/enhancement |
| <b>Swendsen et al., 2011(34)</b> | Study describing a tool intended for research or diagnostic purposes only    |
| <b>Thara et al., 2008(35)</b>    | 1) Theoretical/background article, 2) Lacking information                    |
| <b>Thara et al., 2012(36)</b>    | Study describing a tool intended for research or diagnostic purposes only    |
| <b>Thompson et al., 2011(37)</b> | No e-health application                                                      |
| <b>Välimäki et al., 2008(38)</b> | Double publication (we included Kuosmanen et al., 2009)                      |
| <b>Wallace et al., 2001(39)</b>  | Study describing a tool intended for research or diagnostic purposes only    |
| <b>Weaver et al., 1994(40)</b>   | Study describing a tool intended for research or diagnostic purposes only    |
| <b>Weiss et al., 1993(41)</b>    | Study describing a tool intended for research or diagnostic purposes only    |

**Zanyi et al., 2009(42)**

Lacking information: full-text was requested from the authors in February 2011 twice, but we did not receive any response

#### References

1. Ahmed M, Bayog F, Boisvert CM: Computer-facilitated therapy for inpatients with schizophrenia. *Psychiatric services (Washington, D.C.)* 48:1334-1335, 1997
2. Ahmed M: Computer-facilitated dialogue with patients who have schizophrenia. *Psychiatric services (Washington, D.C.)* 53:99-100, 2002
3. Alger I: Interactive videodiscs: suicide and chronic mental illness. *Hospital & community psychiatry* 40:582-583, 1989
4. Andrews SB, Drake T, Haslett W, et al: Developing web-based online support tools: the Dartmouth decision support software. *Psychiatric rehabilitation journal* 34:37-41, 2010
5. Anttila M, Koivunen M, Valimaki M: Information technology-based standardized patient education in psychiatric inpatient care. *Journal of advanced nursing* 64:147-156, 2008
6. Baker EK, Kurtz MM, Astur RS: Virtual reality assessment of medication compliance in patients with schizophrenia. *Cyberpsychology & Behavior: The Impact Of The Internet, Multimedia And Virtual Reality On Behavior And Society* 9:224-229, 2006
7. Brief R: Personal computers in psychiatric rehabilitation: a new approach to skills training. *Hospital & community psychiatry* 45:257-260, 1994

8. Chinman M, Young AS, Schell T, et al: Computer-assisted self-assessment in persons with severe mental illness. *The Journal of clinical psychiatry* 65:1343-1351, 2004
9. Chinman M, Hassell J, Magnabosco J, et al: The feasibility of computerized patient self-assessment at mental health clinics. *Administration and Policy in Mental Health* 34:401-409, 2007
10. Cohen AS, Alpert M, Nienow TM, et al: Computerized measurement of negative symptoms in schizophrenia. *Journal of psychiatric research* 42:827-836, 2008
11. Delisi LE, Fleischhacker WW: Technology-driven science: will it advance treatment of schizophrenia going into the second decade of the 21st century? *Current Opinion in Psychiatry* 24:89-90, 2011
12. Fernandez-Aranda F, Jimenez-Murcia S, Santamaria JJ, et al: Video games as a complementary therapy tool in mental disorders: PlayMancer, a European multicentre study. *Journal of mental health (Abingdon, England)* 21:364-374, 2012
13. Ferron J, C., Brunette M, F., McHugo G, J., et al: Developing a Quit Smoking Website That is Usable by People with Severe Mental Illnesses. *Psychiatric rehabilitation journal* 35:111-116, 2011
14. Freeman D: Studying and treating schizophrenia using virtual reality: a new paradigm. *Schizophrenia bulletin* 34:605-610, 2008
15. Godleski L, Cervone D, Vogel D, et al: Home telemental health implementation and outcomes using electronic messaging. *Journal of telemedicine and telecare* 18:17-19, 2012
16. Gorrindo T, Groves JE: Computer simulation and virtual reality in the diagnosis and treatment of psychiatric disorders. *Academic psychiatry : the journal of the American Association of Directors of Psychiatric Residency Training and the Association for Academic Psychiatry* 33:413-417, 2009

17. Grady B, Singleton M: Telepsychiatry "coverage" to a rural inpatient psychiatric unit. *Telemedicine journal and e-health : the official journal of the American Telemedicine Association* 17:603-608, 2011
18. Hansson L, Svensson B, Björkman T, et al: What works for whom in a computer-mediated communication intervention in community psychiatry? Moderators of outcome in a cluster randomized trial. *Acta Psychiatrica Scandinavica* 118:404-409, 2008
19. Hatonen H, Suhonen R, Warro H, et al: Patients' perceptions of patient education on psychiatric inpatient wards: a qualitative study. *Journal of Psychiatric & Mental Health Nursing* 17:335-341, 2010
20. Jeste DV, Palmer BW, Golshan S, et al: Multimedia consent for research in people with schizophrenia and normal subjects: a randomized controlled trial. *Schizophrenia bulletin* 35:719-729, 2009
21. Jimison HB, Sher PP, Appleyard R, et al: The use of multimedia in the informed consent process. *Journal of the American Medical Informatics Association : JAMIA* 5:245-256, 1998
22. Kim K, Kim JJ, Kim J, et al: Characteristics of social perception assessed in schizophrenia using virtual reality. *Cyberpsychology & behavior : the impact of the Internet, multimedia and virtual reality on behavior and society* 10:215-219, 2007
23. Koivunen M, Välimäki M, Pitkänen A, et al: A preliminary usability evaluation of web-based portal application for patients with schizophrenia. *Journal of psychiatric and mental health nursing* 14:462-469, 2007

24. Koivunen M, Hatonen H, Valimaki M: Barriers and facilitators influencing the implementation of an interactive Internet-portal application for patient education in psychiatric hospitals. *Patient education and counseling* 70:412-419, 2008
25. Koivunen M, Valimaki M, Patel A, et al: Effects of the implementation of the web-based patient support system on staff's attitudes towards computers and IT use: a randomised controlled trial. *Scandinavian journal of caring sciences* 24:592-599, 2010
26. Kuosmanen L, Jakobsson T, Hyttinen J, et al: Usability evaluation of a web-based patient information system for individuals with severe mental health problems. *Journal of advanced nursing* 66:2701-2710, 2010
27. Pijnenborg G, Evans JJ, Withaar FK, et al: SMS text messages as a prosthetic aid in the cognitive rehabilitation of schizophrenia. *Rehabilitation Psychology* 52:236-240, 2007
28. Pitkanen A, Valimaki M, Kuosmanen L, et al: Patient education methods to support quality of life and functional ability among patients with schizophrenia: a randomised clinical trial. *Quality of life research : an international journal of quality of life aspects of treatment, care and rehabilitation*, 2011
29. Puskar K, Schlenk E, A., Callan J, et al: Relational agents as an adjunct in schizophrenia treatment. *Journal of Psychosocial Nursing & Mental Health Services* 49:22-29, 2011
30. Rotondi AJ, Haas GL, Anderson CM, et al: A Clinical Trial to Test the Feasibility of a Telehealth Psychoeducational Intervention for Persons With Schizophrenia and Their Families: Intervention and 3-Month Findings. *Rehabilitation Psychology* 50:325-336, 2005



31. Španiel F, Vohlídka P, Kozeny J, et al: The Information Technology Aided Relapse Prevention Programme in Schizophrenia: an extension of a mirror-design follow-up. *International journal of clinical practice* 62:1943-1946, 2008
32. Španiel F, Vohlídka P, Hrdlička J, et al: ITAREPS: Information Technology Aided Relapse Prevention Programme in Schizophrenia. *Schizophrenia research* 98:312-317, 2008
33. Steel C, Wykes T, Ruddle A, et al: Can we harness computerised cognitive bias modification to treat anxiety in schizophrenia? A first step highlighting the role of mental imagery. *Psychiatry research* 178:451-455, 2010
34. Swendsen J, Ben-Zeev D, Granholm E: Real-time electronic ambulatory monitoring of substance use and symptom expression in schizophrenia. *American Journal of Psychiatry* 168:202-209, 2011
35. Thara R, John S, Rao K: Telepsychiatry in Chennai, India: the SCARF experience. *Behavioral sciences & the law* 26:315-322, 2008
36. Thara R: Using mobile telepsychiatry to close the mental health gap. *Current psychiatry reports* 14:167-168, 2012
37. Thompson A, Hetrick S, E., Álvarez-Jiménez M, et al: Targeted intervention to improve monitoring of antipsychotic-induced weight gain and metabolic disturbance in first episode psychosis. *Australian & New Zealand Journal of Psychiatry* 45:740-748, 2011
38. Valimaki M, Anttila M, Hatonen H, et al: Design and development process of patient-centered computer-based support system for patients with schizophrenia spectrum psychosis. *Informatics for Health & Social Care* 33:113-123, 2008

39. Wallace CJ, Lecomte T, Wilde J, et al: CASIG: a consumer-centered assessment for planning individualized treatment and evaluating program outcomes. *Schizophrenia research* 50:105-119, 2001
40. Weaver RA, Christensen PW, Sells J, et al: Computerized treatment planning. *Hospital & community psychiatry* 45:825-827, 1994
41. Weiss KM, Chapman HA: A computer-assisted inpatient psychiatric assessment and treatment planning system. *Hospital & community psychiatry* 44:1097-1100, 1993
42. Zányi E, Selmanovic E, Broome M, et al: Interactive highly realistic virtual reality as a tool for understanding the genesis and treatment of psychotic symptoms. *Annual Review of CyberTherapy and Telemedicine* 7:138-140, 2009



*data for the main outcomes?*

8. Have all important adverse events that may be a consequence of the intervention been reported?

|               |               |               |               |               |               |               |               |               |               |               |    |               |               |               |
|---------------|---------------|---------------|---------------|---------------|---------------|---------------|---------------|---------------|---------------|---------------|----|---------------|---------------|---------------|
| Yes (1 point) | No | Yes (1 point) | Yes (1 point) | Yes (1 point) |
|---------------|---------------|---------------|---------------|---------------|---------------|---------------|---------------|---------------|---------------|---------------|----|---------------|---------------|---------------|

9. Have the characteristics of study participants lost to follow-up been described?

|    |               |               |    |               |               |    |    |               |    |    |    |    |               |    |
|----|---------------|---------------|----|---------------|---------------|----|----|---------------|----|----|----|----|---------------|----|
| No | Yes (1 point) | Yes (1 point) | No | Yes (1 point) | Yes (1 point) | No | No | Yes (1 point) | No | No | No | No | Yes (1 point) | No |
|----|---------------|---------------|----|---------------|---------------|----|----|---------------|----|----|----|----|---------------|----|

10. Have actual probability values been reported (e.g. 0.035 rather than <0.05) for the main outcomes except where the probability value is less than 0.001?

|               |               |               |               |               |               |               |               |               |               |               |               |               |               |    |               |
|---------------|---------------|---------------|---------------|---------------|---------------|---------------|---------------|---------------|---------------|---------------|---------------|---------------|---------------|----|---------------|
| Yes (1 point) | No | Yes (1 point) |
|---------------|---------------|---------------|---------------|---------------|---------------|---------------|---------------|---------------|---------------|---------------|---------------|---------------|---------------|----|---------------|

*External validity*

11. Were the subjects asked to participate in the study representative of the entire population from which they were recruited?

|                     |                     |                     |                     |                     |                     |                     |                     |                     |                     |                     |                     |                     |                     |                     |                     |
|---------------------|---------------------|---------------------|---------------------|---------------------|---------------------|---------------------|---------------------|---------------------|---------------------|---------------------|---------------------|---------------------|---------------------|---------------------|---------------------|
| Unable to determine |
|---------------------|---------------------|---------------------|---------------------|---------------------|---------------------|---------------------|---------------------|---------------------|---------------------|---------------------|---------------------|---------------------|---------------------|---------------------|---------------------|

12. Were those subjects who were prepared to participate representative of the entire population from which they were recruited?

|                     |                     |                     |                     |                     |                     |                     |                     |                     |                     |                     |                     |                     |                     |                     |                     |
|---------------------|---------------------|---------------------|---------------------|---------------------|---------------------|---------------------|---------------------|---------------------|---------------------|---------------------|---------------------|---------------------|---------------------|---------------------|---------------------|
| Unable to determine |
|---------------------|---------------------|---------------------|---------------------|---------------------|---------------------|---------------------|---------------------|---------------------|---------------------|---------------------|---------------------|---------------------|---------------------|---------------------|---------------------|

13. Were the staff,

|     |           |     |     |           |     |           |    |     |           |        |        |        |     |
|-----|-----------|-----|-----|-----------|-----|-----------|----|-----|-----------|--------|--------|--------|-----|
| Yes | Unable to | Yes | Yes | Unable to | Yes | Unable to | No | Yes | Unable to | Yes (1 | Yes (1 | Unable | Yes |
|-----|-----------|-----|-----|-----------|-----|-----------|----|-----|-----------|--------|--------|--------|-----|

places, and facilities where the patients were treated, representative of the treatment the majority of patients receive? (1 point) determine (1 point) (1 point) determine (1 point) determine (1 point) determine (1 point) determine point) point) to determine (1 point)

*Internal validity - bias*

14. Was an attempt made to blind study subjects to the intervention they have received?\*

|               |               |               |               |               |               |               |               |               |               |               |               |               |               |               |
|---------------|---------------|---------------|---------------|---------------|---------------|---------------|---------------|---------------|---------------|---------------|---------------|---------------|---------------|---------------|
| Yes (1 point) |
|---------------|---------------|---------------|---------------|---------------|---------------|---------------|---------------|---------------|---------------|---------------|---------------|---------------|---------------|---------------|

15. Was an attempt made to blind those measuring the main outcomes of the intervention?

|    |    |    |    |    |    |    |    |    |    |    |    |               |    |    |
|----|----|----|----|----|----|----|----|----|----|----|----|---------------|----|----|
| No | Yes (1 point) | No | No |
|----|----|----|----|----|----|----|----|----|----|----|----|---------------|----|----|

16. If any of the results of the study were based on "Data dredging", was this made clear?

|               |               |               |               |               |               |               |               |               |               |               |    |               |               |               |
|---------------|---------------|---------------|---------------|---------------|---------------|---------------|---------------|---------------|---------------|---------------|----|---------------|---------------|---------------|
| Yes (1 point) | No | Yes (1 point) | Yes (1 point) | Yes (1 point) |
|---------------|---------------|---------------|---------------|---------------|---------------|---------------|---------------|---------------|---------------|---------------|----|---------------|---------------|---------------|

17. In trials and cohort studies, do the analyses adjust for different lengths of follow-up of patients, or in case-control studies, is the time period between the intervention and outcome the same for cases and controls?

|               |               |               |               |               |               |               |               |               |               |               |               |               |               |               |
|---------------|---------------|---------------|---------------|---------------|---------------|---------------|---------------|---------------|---------------|---------------|---------------|---------------|---------------|---------------|
| Yes (1 point) |
|---------------|---------------|---------------|---------------|---------------|---------------|---------------|---------------|---------------|---------------|---------------|---------------|---------------|---------------|---------------|

18. Were the statistical tests used to assess the main outcomes appropriate

|               |               |    |               |               |               |               |               |               |               |               |               |               |               |               |
|---------------|---------------|----|---------------|---------------|---------------|---------------|---------------|---------------|---------------|---------------|---------------|---------------|---------------|---------------|
| Yes (1 point) | Yes (1 point) | No | Yes (1 point) |
|---------------|---------------|----|---------------|---------------|---------------|---------------|---------------|---------------|---------------|---------------|---------------|---------------|---------------|---------------|

19. Was

|     |     |     |     |     |     |     |     |     |     |     |        |    |     |     |
|-----|-----|-----|-----|-----|-----|-----|-----|-----|-----|-----|--------|----|-----|-----|
| Yes (1 | No | Yes | Yes |
|-----|-----|-----|-----|-----|-----|-----|-----|-----|-----|-----|--------|----|-----|-----|

*compliance with the intervention/s reliable?*

(1 point) point) (1 point) (1 point)

*20. Were the main outcome measures used accurate (valid and reliable)?*

Yes (1 point) Yes (1 point)

*Internal validity - confounding*

*21. Were the participants in different intervention groups (trials and cohort studies) or were the cases and controls (case-control studies) recruited from the same population?*

Yes (1 point) No Yes (1 point) Yes (1 point)

*22. Were study subjects in different intervention groups (trials and cohort studies) or were the cases and controls (case-control studies) recruited over the same period of time?*

Yes (1 point) No Yes (1 point) No Yes (1 point) Yes (1 point) Yes (1 point)

*23. Were study subjects randomized to intervention groups?*

Yes (1 point) No Yes (1 point) No Yes (1 point) Yes (1 point) Yes (1 point)

*24. Was the randomized intervention assignment concealed from both patients and health care staff?*

Unable to determine No Yes (1 point) Unable to determine Unable to determine

until recruitment was complete and irrevocable?

|                                                                                                            |                  |                  |                  |    |                  |                  |                  |                  |                  |    |                  |                  |                  |                  |
|------------------------------------------------------------------------------------------------------------|------------------|------------------|------------------|----|------------------|------------------|------------------|------------------|------------------|----|------------------|------------------|------------------|------------------|
| 25. Was there adequate adjustment for confounding in the analyses from which the main findings were drawn? | Yes<br>(1 point) | Yes<br>(1 point) | Yes<br>(1 point) | No | Yes<br>(1 point) | No | Yes<br>(1 point) | Yes<br>(1 point) | Yes<br>(1 point) | Yes<br>(1 point) |
|------------------------------------------------------------------------------------------------------------|------------------|------------------|------------------|----|------------------|------------------|------------------|------------------|------------------|----|------------------|------------------|------------------|------------------|

|                                                              |                  |                  |                  |                  |                  |                  |    |                  |                  |                     |                  |                  |                  |                  |
|--------------------------------------------------------------|------------------|------------------|------------------|------------------|------------------|------------------|----|------------------|------------------|---------------------|------------------|------------------|------------------|------------------|
| 26. Were losses of patients to follow-up taken into account? | Yes<br>(1 point) | No | Yes<br>(1 point) | Yes<br>(1 point) | Unable to determine | Yes<br>(1 point) | Yes<br>(1 point) | Yes<br>(1 point) | Yes<br>(1 point) |
|--------------------------------------------------------------|------------------|------------------|------------------|------------------|------------------|------------------|----|------------------|------------------|---------------------|------------------|------------------|------------------|------------------|

|                                                                                                                                                                   |    |                     |                     |    |                  |                                  |                     |                     |                  |    |    |                  |                     |                     |
|-------------------------------------------------------------------------------------------------------------------------------------------------------------------|----|---------------------|---------------------|----|------------------|----------------------------------|---------------------|---------------------|------------------|----|----|------------------|---------------------|---------------------|
| 27. Did the study have sufficient power to detect a clinically important effect where the probability value for a difference being due to chance is less than 5%? | No | Unable to determine | Unable to determine | No | Yes<br>(1 point) | <i>Power</i><br>Yes<br>(1 point) | Unable to determine | Unable to determine | Yes<br>(1 point) | No | No | Yes<br>(1 point) | Unable to determine | Unable to determine |
|-------------------------------------------------------------------------------------------------------------------------------------------------------------------|----|---------------------|---------------------|----|------------------|----------------------------------|---------------------|---------------------|------------------|----|----|------------------|---------------------|---------------------|

|                    |              |              |              |              |              |              |              |              |              |              |              |              |              |              |
|--------------------|--------------|--------------|--------------|--------------|--------------|--------------|--------------|--------------|--------------|--------------|--------------|--------------|--------------|--------------|
| <b>Total score</b> | 22<br>(good) | 19<br>(fair) | 22<br>(good) | 19<br>(fair) | 23<br>(good) | 24<br>(good) | 20<br>(good) | 21<br>(good) | 24<br>(good) | 18<br>(fair) | 18<br>(fair) | 22<br>(good) | 21<br>(good) | 22<br>(good) |
|--------------------|--------------|--------------|--------------|--------------|--------------|--------------|--------------|--------------|--------------|--------------|--------------|--------------|--------------|--------------|

NB: In the Downs and Black scale, 'No' and 'Unable to determine' are graded with 0 points, while 'Yes' is graded either with 1 or 2 points.

\* As blinding is not possible in these studies, this cannot be considered a flaw. Therefore, a 1 is appointed to these studies on this item.

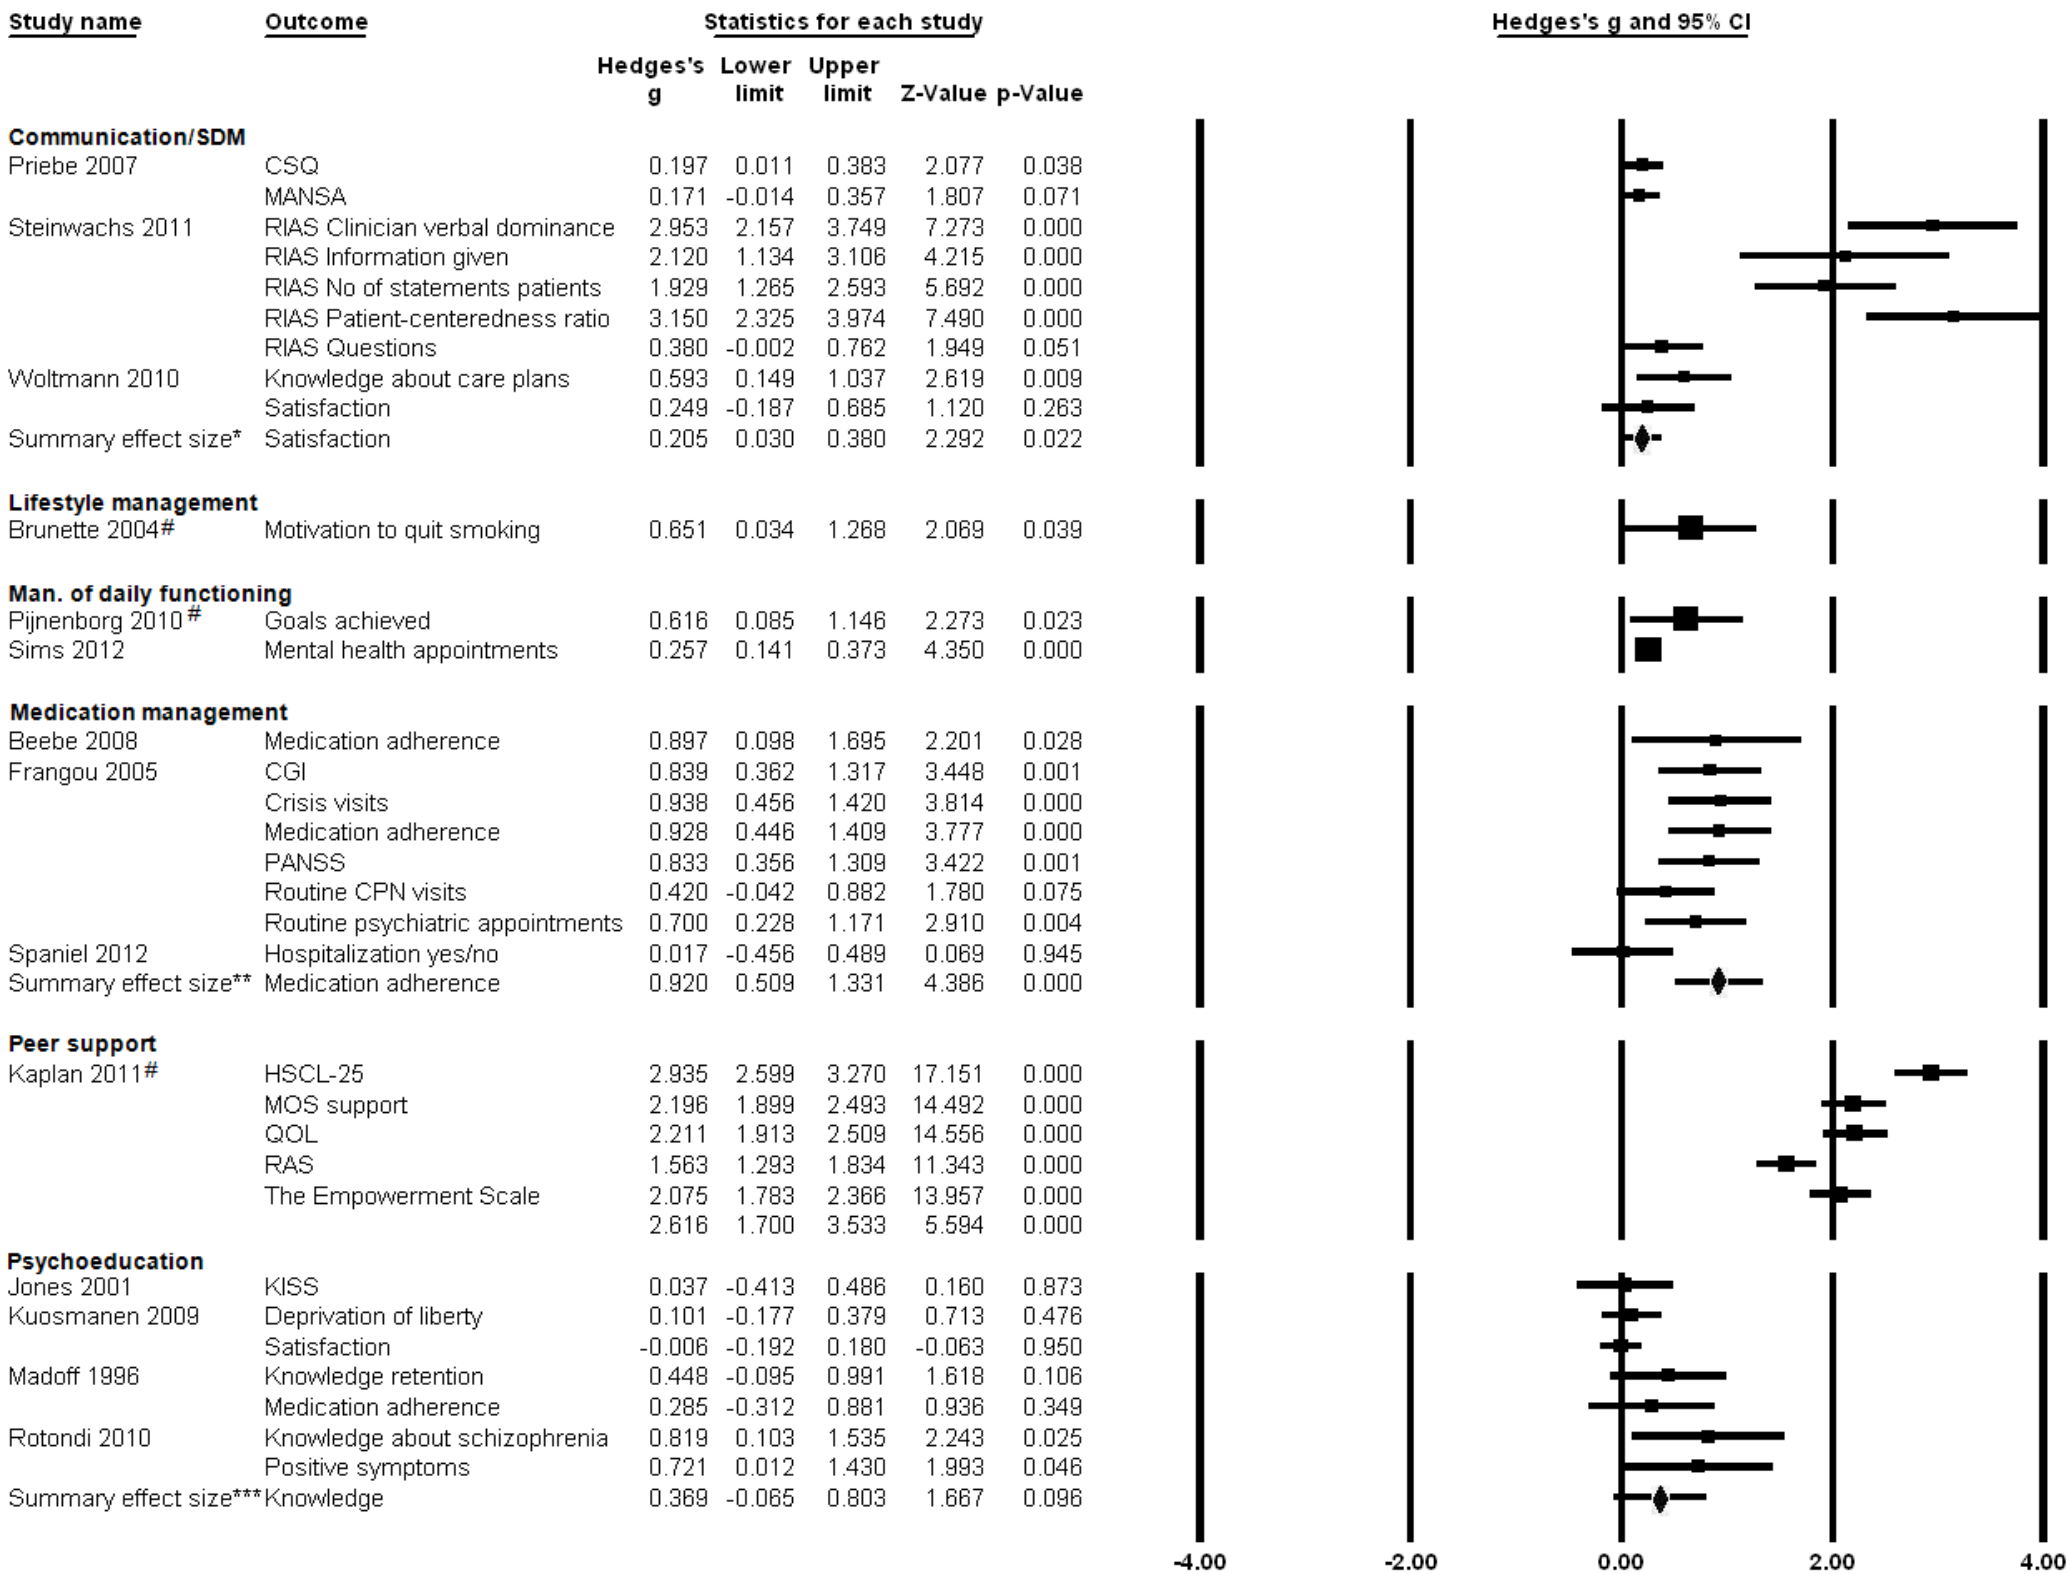

Supplement: 33_ds001.pdf [file 33_ds001.pdf]
